# Supplementary material for: Structural basis for the activity and specificity of the immune checkpoint inhibitor lirilumab
Source: PubMed Central journal article supplement (PMC10772121; doi:10.1038/s41598-023-50262-6), 2024-01-07
Supplement: 41598_2023_50262_MOESM1_ESM.pdf [file 41598_2023_50262_MOESM1_ESM.pdf]

# **Supplementary Materials for**

## **Structural basis for the activity and specificity of the immune checkpoint inhibitor lirilumab**

Nicholas Lorig-Roach et al.

\*Corresponding author: Rebecca DuBois, [rmdubois@ucsc.edu](mailto:rmdubois@ucsc.edu)

### **Includes:**

Figs. S1  
Tables S1 and S2

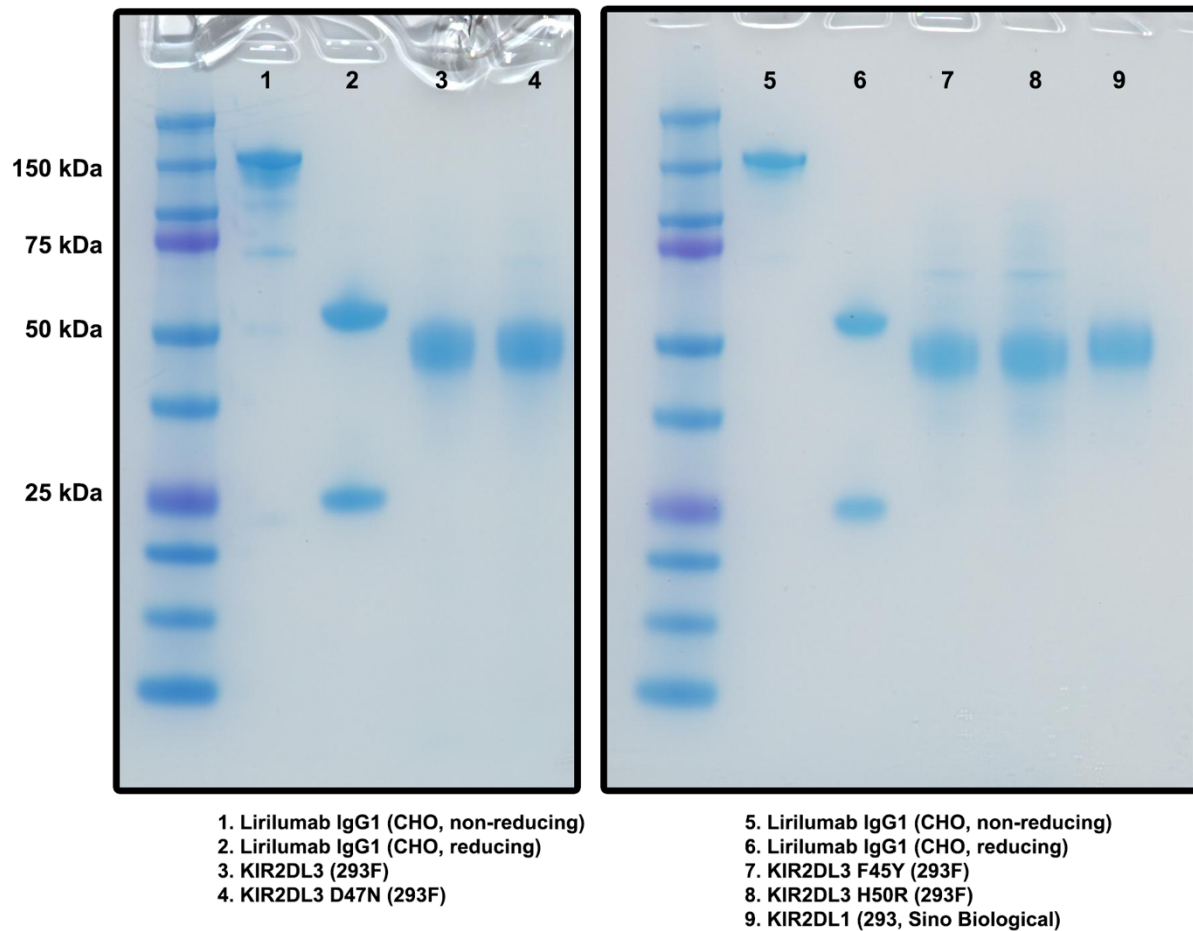

**Fig. S1: SDS-PAGE gels showing lirilumab IgG1, KIR receptors used for BLI assays.** Lirilumab IgG1 was purified from CHO-S cell supernatant using protein A resin. KIR receptors were purified from HEK293F supernatant using EDTA-resistant Ni-NTA followed by size exclusion chromatography.

**Table S1.** BLI kinetics model parameters for binding between lirilumab (IgG1) and KIR2DL1, KIR2DL3, and KIR2DL3 variants.

|                           | K <sub>D</sub> (nM) <sup>a</sup> | R <sup>2</sup> | Model Fit Parameters |                       |                      |
|---------------------------|----------------------------------|----------------|----------------------|-----------------------|----------------------|
|                           |                                  |                | χ <sup>2</sup>       | k <sub>a</sub> (1/Ms) | k <sub>d</sub> (1/s) |
| KIR2DL3                   | 1.64                             | 0.9952         | 0.5141               | 2.240E05              | 3.663E-04            |
|                           | 2.83                             | 0.9954         | 0.3523               | 2.197E05              | 6.219E-04            |
|                           | 3.78                             | 0.9959         | 0.1989               | 2.363E05              | 8.920E-04            |
| KIR2DL1                   | 11.5                             | 0.9912         | 1.0485               | 8.319E04              | 9.537E-04            |
|                           | 9.6                              | 0.9932         | 0.7627               | 1.038E05              | 9.946E-04            |
|                           | 8.8                              | 0.9942         | 0.6410               | 1.074E05              | 9.475E-04            |
| KIR2DL3 F45Y              | 10.25                            | 0.9932         | 0.6602               | 1.218E05              | 1.249E-03            |
|                           | 10.8                             | 0.9943         | 0.4065               | 1.437E05              | 1.554E-03            |
|                           | 8.5                              | 0.9895         | 0.3643               | 1.705E05              | 1.450E-03            |
| KIR2DL3 D47N <sup>b</sup> | 1400                             | 0.9991         | 0                    | --                    | --                   |
|                           | 1900                             | 0.9973         | 0.0001               | --                    | --                   |
| KIR2DL3 H50R              | 7.98                             | 0.9795         | 2.12                 | 2.442E05              | 1.948E-03            |
|                           | 10.6                             | 0.9818         | 1.311                | 2.308E05              | 2.437E-03            |
|                           | 15                               | 0.9774         | 2.3512               | 2.116E05              | 3.175E-03            |

<sup>a</sup>K<sub>D</sub> determined using Octet Data Analysis HT software's 1:1 binding model with the 'global' fit setting and using at least 4 curves for each experiment

<sup>b</sup>K<sub>D</sub> determined using a steady state binding model due to poor fitting of the 1:1 model

**Table S2.** High frequency (>5%) inhibitory KIR2D receptor missense variants and other variants of interest

| Var# <sup>a</sup> | KIR       | Variant accession number | Genome location (GRCh38.p14) | Mutation                    | Minor Allele Frequency, Global (1000genomes_30x) |
|-------------------|-----------|--------------------------|------------------------------|-----------------------------|--------------------------------------------------|
|                   | KIR2DL1   | rs666590                 | 54775402                     | A>G = H182R                 | 0.291                                            |
|                   | KIR2DL1   | rs147072532              | 54775344                     | G>A = D163N                 | 0.277                                            |
|                   | KIR2DL1   | rs111799279              | 54775317                     | C>A = P154T                 | 0.276                                            |
|                   | KIR2DL1   | rs11673144               | 54775198                     | T>C = L114P                 | 0.266                                            |
|                   | KIR2DL1   | rs199644153              | 54775213                     | T>A = L119N                 | 0.261                                            |
|                   | KIR2DL1   | rs597681                 | 54778656                     | A>G = K216E                 | 0.220                                            |
|                   | KIR2DL1   | rs687885                 | 54773593                     | G>T = V90L                  | 0.210                                            |
|                   | KIR2DL1   | rs574769826              | 54775225                     | A>G = N123S                 | 0.199                                            |
| Var13             | KIR2DL1   | rs687485                 | 54773534                     | C>A = T70K                  | 0.194                                            |
|                   | KIR2DL1   | rs2916003                | 54775357                     | G>A = G167D                 | 0.179                                            |
|                   | KIR2DL1   | rs200746024              | 54775315                     | G>T = G153V                 | 0.158                                            |
|                   | KIR2DL1   | rs538559888              | 54775318                     | C>G = P154R                 | 0.155                                            |
|                   | KIR2DL1   | rs34721508               | 54783002                     | C>T = R245C                 | 0.155                                            |
| Var8              | KIR2DL1   | rs35509911               | 54773372                     | G>C = R16P                  | 0.155                                            |
|                   | KIR2DL1   | rs62121640               | 54775329                     | G>A = G158R                 | 0.151                                            |
|                   | KIR2DL1   | rs2756923                | 54783763                     | A>G = T312A                 | 0.151                                            |
|                   | KIR2DL1   | rs2304224                | 54769863                     | Signal sequence             | 0.146                                            |
|                   | KIR2DL1   | rs202205602              | 54775305                     | C>T = L150F                 | 0.065                                            |
| Var10             | KIR2DL1   | rs375476159              | 54773473                     | C>T = R50C                  | No data                                          |
| Var9              | KIR2DL1   | rs1481853508             | 54773452                     | G>A = G43R;<br>G>C = G43R   | No data                                          |
| Var11             | KIR2DL1   | rs760965171              | 54773494                     | G>C = D57H                  | No data                                          |
| Var12             | KIR2DL1   | rs765722009              | 54773519                     | C>T = S65F                  | No data                                          |
|                   | KIR2DL3   | rs3810343                | 54738571                     | Signal sequence             | 0.361                                            |
| Var2              | KIR2DL2/3 | rs35719984               | 54742075                     | C>G = Q35E                  | 0.340                                            |
|                   | KIR2DL3   | rs1049267                | 54752446                     | G>A = R297H;<br>G>C = R297P | 0.236 (A)<br>0.160 (C)                           |
|                   | KIR2DL2/3 | rs200686594              | 54743929                     | C>T = R148C                 | 0.194                                            |
|                   | KIR2DL2/3 | rs150145497              | 54744086                     | C>T = T200I                 | 0.149                                            |
| Var4              | KIR2DL2/3 | rs78713511               | 54742106                     | T>A = F45Y                  | 0.135                                            |
|                   | KIR2DL2/3 | rs1555897648             | 54742019                     | C>G = P16R                  | 0.134                                            |
|                   | KIR2DL2/3 | rs201504521              | 54743909                     | G>C = R141T                 | 0.120                                            |
|                   | KIR2DL3   | rs35861855               | 54747356                     | C>T = P208L                 | 0.115                                            |
|                   | KIR2DL2/3 | rs200359536              | 54744000                     | C>A = H171N                 | 0.096                                            |
|                   | KIR2DL2/3 | rs200426472              | 54743878                     | C>T = R131W                 | 0.096                                            |
|                   | KIR2DL3   | rs2365227                | 54752222                     | T>C = V255A                 | 0.085                                            |
|                   | KIR2DL3   | rs4020198                | 54752265                     | G>C = R279S                 | 0.079                                            |
| Var7              | KIR2DL2/3 | rs138897134              | 54742121                     | A>G = H50R                  | 0.057                                            |
| Var1              | KIR2DL2/3 | rs202032116              | 54742004                     | T>G = L11R                  | 0.053                                            |
| Var3              | KIR2DL2/3 | rs76843526               | 54742094                     | G>C = R41T                  | 0.006                                            |
| Var6              | KIR2DL2/3 | rs528413442              | 54742111                     | G>A = D47N                  | 0.001                                            |
| Var5              | KIR2DL2/3 | rs145638569              | 54742110                     | G>C = K46N                  | 0.0002                                           |

<sup>a</sup>Var#s correspond to those listed in Fig. 4.
